# Supplementary material for: The Effect of Aerobic Exercise on Cognitive Function in People with Alzheimer’s Disease: A Systematic Review and Meta-Analysis of Randomized Controlled Trials
Source: MDPI journal article supplement (doi:10.3390/ijerph192315700), 2022-11-25
Supplement: s1 [file s1]

**Table S1.** Baseline characteristics and intervention details of included studies

| Study                      | Country        | Sample size         | Age (y),<br>mean $\pm$ SD;<br>median (range) | Diagnostic<br>criteria                                          | Cognitive<br>impairment | Intervention                                                                                          | Setting                                | Trainer                        | Intervention Details for IG |                     |                           |                                                                                                            | Measurement<br><br>Instrument              |
|----------------------------|----------------|---------------------|----------------------------------------------|-----------------------------------------------------------------|-------------------------|-------------------------------------------------------------------------------------------------------|----------------------------------------|--------------------------------|-----------------------------|---------------------|---------------------------|------------------------------------------------------------------------------------------------------------|--------------------------------------------|
|                            |                |                     |                                              |                                                                 |                         |                                                                                                       |                                        |                                | Duration                    | Days<br>per<br>week | Minutes<br>per<br>session | Intensity                                                                                                  |                                            |
| Arcoverde et al.<br>(2013) | Brazil         | IG = 10<br>CG = 10  | IG: 78.5 (64.0-81.2)<br>CG: 79.0 (74.7-82.2) | NINCDS-<br>ADRDA<br>criteria<br><br>NINDS-<br>AIREN<br>criteria | Mild                    | IG: treadmill walking<br>CG: usual treatment                                                          | Hospital                               | PT, PE                         | 16 w                        | 2                   | 30                        | Moderate: 60%<br>VO <sub>2max</sub>                                                                        | MMSE,<br>CAMCOG,<br>CDT, VF,<br>Stroop     |
| Kim et al.<br>(2016)       | South<br>Korea | IG = 19<br>CG = 14  | IG: 81.9 $\pm$ 7.0<br>CG: 80.9 $\pm$ 6.1     | Clinical<br>diagnosis of<br>dementia                            | Moderate                | IG: lower-limb aerobic<br>exercise using bike + MCP<br>CG: multi component<br>intervention (MCP)      | Nursing<br>institution                 | PT,<br>paramedic               | 24 w                        | 5                   | 60                        | Moderate: 40-60%<br>HR <sub>max</sub>                                                                      | MMSE,<br>ADAS-Cog,<br>CDT                  |
| Hoffmann et al.<br>(2016)  | Denmark        | IG = 107<br>CG = 93 | IG: 69.8 $\pm$ 7.4<br>CG: 71.3 $\pm$ 7.3     | NINCDS-<br>ADRDA<br>criteria                                    | Mild                    | IG: aerobic exercise on<br>ergometer bicycle, cross<br>trainer, and treadmill<br>CG: usual treatment  | Community                              | PT                             | 16 w                        | 3                   | 60                        | Moderate-High: 70-<br>80% HR <sub>max</sub>                                                                | MMSE,<br>SDMT,<br>ADAS-Cog,<br>VF, Stroop, |
| Yu et al.<br>(2020)        | USA            | IG = 53<br>CG = 25  | IG: 77.0 $\pm$ 6.6<br>CG: 78.9 $\pm$ 5.6     | Clinical<br>Dementia<br>Rating scale                            | Moderate                | IG: aerobic exercise on a<br>stationary recumbent<br>bicycle<br>CG: stretching (attention<br>control) | Elderly<br>community                   | Trained staff                  | 24 w                        | 3                   | 60                        | Moderate: 50-70%<br>HRR or score of 9-<br>15 on the Borg<br>rating of perceived<br>exercise (RPE)<br>scale | ADAS-Cog                                   |
| Yang et al.<br>(2015)      | China          | IG = 25<br>CG = 25  | IG: 72.00 $\pm$ 6.69<br>CG: 71.92 $\pm$ 7.28 | NINDS-<br>AIREN<br>criteria                                     | Mild                    | IG: cycling training<br>CG: health education                                                          | Rehabilitation<br>Clinic               | Professional<br>therapist      | 12 w                        | 3                   | 40                        | Moderate: 70%<br>HR <sub>max</sub>                                                                         | MMSE,<br>ADAS-Cog,                         |
| Fang Yu et al.<br>(2021)   | USA            | IG = 64<br>CG = 32  | IG: 77.4 $\pm$ 6.6<br>CG: 77.5 $\pm$ 7.1     | Clinical<br>Dementia<br>Rating scale                            | Mild                    | IG: cycling<br>CG: stretching                                                                         | Gymnasium,<br>Elderly<br>community     | Trained staff                  | 24 w                        | 3                   | 50                        | Moderate: 50-70%<br>HRR or score of 9-<br>15 on the Borg<br>rating of perceived<br>exercise (RPE)<br>scale | ADAS-Cog                                   |
| Sobol et al.<br>(2018)     | Denmark        | IG = 26<br>CG = 29  | IG: 69.2 $\pm$ 6.9<br>CG: 68.9 $\pm$ 7.2     | NINCDS-<br>ADRDA<br>criteria                                    | Mild                    | IG: aerobic exercise on<br>ergometer bicycle, cross<br>trainer, and treadmill<br>CG: usual care       | Not mentioned                          | PT                             | 16 w                        | 3                   | 60                        | Moderate-High: 70-<br>80% HR <sub>max</sub>                                                                | SDMT                                       |
| Vidoni et al.<br>(2019)    | USA            | IG = 33<br>CG = 32  | IG: 74.1 $\pm$ 6.8<br>CG: 71.1 $\pm$ 8.8     | Clinical<br>Dementia<br>Rating scale                            | Mild                    | IG: aerobic exercise<br>CG: ST                                                                        | Professional<br>sports<br>organization | Certified<br>Personal<br>Coach | 26 w                        | 3-5                 | 30-50                     | Moderate: 60-75%<br>HRR                                                                                    | DAD                                        |
| Morris et al.<br>(2017)    | USA            | IG = 39<br>CG = 37  | IG: 74.4 $\pm$ 6.7<br>CG: 71.4 $\pm$ 8.7     | Clinical<br>Dementia<br>Rating scale                            | Mild                    | IG: aerobic exercise<br>CG: ST                                                                        | Professional<br>sports<br>organization | Certified<br>Personal<br>Coach | 26 w                        | 3-5                 | 30-50                     | Moderate: 60-75%<br>HRR                                                                                    | DAD, MMSE                                  |

| Study                    | Country | Sample size                         | Age (y),<br>mean $\pm$ SD;<br>median (range)               | Diagnostic criteria            | Cognitive impairment | Intervention                                                                                     | Setting       | Trainer          | Intervention Details for IG |               |                     |                                                                 | Measurement Instrument |
|--------------------------|---------|-------------------------------------|------------------------------------------------------------|--------------------------------|----------------------|--------------------------------------------------------------------------------------------------|---------------|------------------|-----------------------------|---------------|---------------------|-----------------------------------------------------------------|------------------------|
|                          |         |                                     |                                                            |                                |                      |                                                                                                  |               |                  | Duration                    | Days per week | Minutes per session | Intensity                                                       |                        |
| Cott et al. (2002)       | Canada  | IG = 30<br>CG = 25                  | IG: 83.23 $\pm$ 8.34<br>CG: 79.78 $\pm$ 8.30               | Medical diagnosis of AD        | Severe               | IG: walk and talk<br>CG: no intervention                                                         | Community     | Trained staff    | 16 w                        | 5             | 30                  | Not mentioned                                                   | FACSM                  |
| Holthoff et al. (2015)   | Germany | IG = 15<br>CG = 15                  | IG: 72.40 $\pm$ 4.34<br>CG: 70.67 $\pm$ 5.41               | NINCDS-ADRDA criteria          | Mild                 | IG: lower body training on the movement trainer<br>CG: usual care                                | Community     | Family caregiver | 12 w                        | 3             | 30                  | Not mentioned                                                   | MMSE                   |
| Kemoun et al. (2010)     | France  | IG = 20<br>CG = 18                  | IG: 82.0 $\pm$ 5.80<br>CG: 81.7 $\pm$ 5.10                 | DSM IV criteria                | Moderate             | IG: exercises on walking, equilibrium, and stamina.<br>CG: not practice any physical activities  | Nursing home  | Not mentioned    | 15 w                        | 3             | 60                  | Moderate: 60-70% HRR                                            | ERFC                   |
| Venturelli et al. (2011) | Italy   | IG = 11<br>CG = 10                  | IG: 83.00 $\pm$ 6.00<br>CG: 75.00 $\pm$ 5.00               | Clinical Dementia Rating scale | Moderate             | IG: walking<br>CG: usual care                                                                    | Hospital      | Paramedic        | 24 w                        | 4             | 30                  | Not mentioned                                                   | MMSE                   |
| Venturelli et al. (2016) | Italy   | IG-AE = 20<br>CG = 20               | IG-AE: 84.00 $\pm$ 7.00<br>CG: 84.00 $\pm$ 10.00           | Clinical diagnosis of dementia | Moderate             | IG: walking<br>CG: usual care                                                                    | Hospital      | Paramedic        | 12 w                        | 5             | 60                  | Moderate-High: Not mentioned                                    | MMSE                   |
| Enette et al. (2020)     | France  | IG-CAT=14<br>IG-IAT = 17<br>CG = 21 | IG-CAT: 74 (68-83)<br>IG-IAT: 79 (75-82)<br>CG: 79 (75-84) | DSM IV criteria                | Moderate             | IG-CAT: continuous aerobic training<br>IG-IAT: interval aerobic training<br>CG: health education | Not mentioned | PT               | 9 w                         | 3             | 30                  | Moderate: IG-CAT, 70% HRmax<br>Moderate-High: IG-IAT, 80% HRmax | MMSE                   |

**Note:** Cognitive impairment level is classified by the average Mini-Mental State Exam score of participants (20 to 30: mild; 10 to 20: moderate; < 10: severe).

**Abbreviations:** IG, intervention group; CG, control group; w, week (s); y, years; SD, standard deviation; MCP, consisted of music therapy, art therapy, horticulture therapy, handicraft, recreational therapy, stretching, laughing therapy, and activity therapy; ST, stretching and toning (nonaerobic exercises that core strengthening, resistance bands, modified tai chi, and modified yoga); MMSE, Mini-Mental State Examination; CAMCOG, CAMCOG-CANDEX, Cambridge Examination for Mental Disorders of the Elderly; CDT: Clock Drawing Test; VF, verbal fluency test; Stroop, Stroop Color and Word test; ADAS-Cog, Alzheimer's Disease Assessment Scale-Cognitive Subscale; SDMT, Symbol Digit Modalities Test; DAD, Disability Assessment for Dementia; FACSM, Functional Assessment of Communication Skills Mental Subscale; ERFC, Rapid Evaluation of Cognitive Function; NINCDS-ADRDA, Neurological and Communicative Disorders and Stroke Alzheimer's Disease and Related Disorders Association; NINDS-AIREN, National Institute of Neurological Disorders and Stroke-Association Internationale pour la Recherche et l'Enseignement en Neurosciences; DSM IV, Diagnostic and Statistical Manual-fourth edition; PT, Physical therapist; PE, Physical educator
